# Supplementary material for: Early Speech and Language Development in Children With Nonsyndromic Cleft Lip and/or Palate: A Meta-Analysis
Source: PubMed Central journal article supplement (PMC7213476; doi:10.1044/2019_jslhr-19-00162), 2019-12-13
Supplement: JSLHR-63-14-s002.pdf [file JSLHR-63-14-s002.pdf]

## Supplemental Material S2. Code for Meta-Analysis.

Load libraries

```
suppressMessages({library(dplyr)
library(meta)
library(readxl)
library(robumeta)
library(grid)
library(irr)})
```

### Load data

```
cleft_meta_study <- read_delim("~/SuppD_studydata.txt", "\t", escape_double =
FALSE, trim_ws = TRUE)

cleft_meta <- read_delim("~/SuppE_studydata.txt", "\t", escape_double = FALSE,
trim_ws = TRUE)
```

### Prepare data

The following several code chunks prepare the data for analysis.

#### Adding study label

This section of code creates a study label based on the first author's last name and the publication year (e.g., Broen 1998).

```
# create study label variable
cleft_meta_study$study_lab <- paste(cleft_meta_study$author, cleft_meta_study
$year)

# create df with just study_id and study_label
study_label <- cleft_meta_study %>%
  select(study_id, study_lab)
```

This code chunk appends the study label to the study data dataframe.

```
cleft_meta$study_id <- as.character(cleft_meta$study_id)

cleft_meta$name <- as.factor(cleft_meta$name)
```

## Create standard error terms

This code chunk creates the standard error terms for the effect sizes.

```
cleft_meta <- cleft_meta %>%  
  mutate(eff_se = sqrt(var))
```

## Transform d --> g

This code chunk transforms Cohen's d effect sizes to Hedge's g.

```
d_to_g <- function(eff_d, n1, n2){  
  eff_d * (1 - (3 / (4 * (n1 + n2) - 9)))  
}  
  
cleft_meta <- cleft_meta %>%  
  mutate(eff_g = d_to_g(eff_size, cleft_n, compare_n))
```

## Subset data

This code chunk subsets the effect size data into each subconstruct for later analysis.

```
con <- cleft_meta %>%  
  filter(sub_construct == 11)  
  
acc <- cleft_meta %>%  
  filter(sub_construct == 12)  
  
error <- cleft_meta %>%  
  filter(sub_construct == 13) %>%  
  filter(!is.na(eff_size))  
  
recep_d <- cleft_meta %>%  
  filter(sub_construct == 21)  
  
express_d <- cleft_meta %>%  
  filter(sub_construct == 22) %>%  
  filter(study_id != 11)
```

## Study data

The following code chunks summarize the demographic information about the total sample, the speech studies only, and the language studies only. These data were used to create Table 1.

## Total sample

```
incl_s <- unique(cleft_meta$study_id)

cleft_meta_study %>%
  filter(study_id %in% incl_s) %>%
  mutate(total_n = cleft_n + comp_n) %>%
  summarise(n_studies = n(),
            reli_n = sum(reliability == 1, na.rm = T),
            synd_n = sum(syndrome_exclude == 1, na.rm = T),
            group_n = sum(study_design == 2 | study_design == 4),
            long_n = sum(study_design == 5),
            int_n = sum(study_design == 1 | study_design == 3),
            tot_n = sum(total_n, na.rm=T),
            mean_cleft_age = mean(cleft_age_m, na.rm=T),
            sd_cleft_age = sd(cleft_age_m, na.rm = T),
            mean_compare_age = mean(comp_age_m, na.rm=T),
            sd_compare_age = sd(comp_age_m, na.rm = T),
            tot_cleft_n = sum(cleft_n, na.rm=T),
            tot_compare_n = sum(comp_n, na.rm=T),
            mean_pal = mean(pal_repair_age, na.rm = T),
            usa = sum(international == 0),
            loc_other = sum(international == 1 | international == 9),
            pub_06 = sum(year >= 2006),
            pub_05 = sum(year < 2006),
            pal_sd = sd(pal_repair_age, na.rm = T),
            per_m_w = mean(per_male_whole, na.rm = T),
            per_sd_w = sd(per_male_whole, na.rm = T),
            per_m_c = mean(per_male_cleft, na.rm = T),
            per_sd_c = sd(per_male_cleft, na.rm = T))
```

## Speech studies

```
speech_s <- cleft_meta %>%
  filter(construct == 1)

speech_s <- unique(speech_s$study_id)

cleft_meta_study %>%
  filter(study_id %in% speech_s) %>%
  mutate(total_n = cleft_n + comp_n) %>%
  summarise(n_studies = n(),
            reli_n = sum(reliability == 1, na.rm = T),
            synd_n = sum(syndrome_exclude == 1, na.rm = T),
            group_n = sum(study_design == 2 | study_design == 4),
            long_n = sum(study_design == 5),
            int_n = sum(study_design == 1 | study_design == 3),
            tot_n = sum(total_n, na.rm=T),
            mean_cleft_age = mean(cleft_age_m, na.rm=T),
            sd_cleft_age = sd(cleft_age_m, na.rm = T),
            mean_compare_age = mean(comp_age_m, na.rm=T),
```

```
sd_compare_age = sd(comp_age_m, na.rm = T),
tot_cleft_n = sum(cleft_n, na.rm=T),
tot_compare_n = sum(comp_n, na.rm=T),
mean_pal = mean(pal_repair_age, na.rm = T),
usa = sum(international == 0),
loc_other = sum(international == 1 | international == 9),
pub_06 = sum(year >= 2006),
pub_05 = sum(year < 2006),
pal_sd = sd(pal_repair_age, na.rm = T),
per_m_w = mean(per_male_whole, na.rm = T),
per_sd_w = sd(per_male_whole, na.rm = T),
per_m_c = mean(per_male_cleft, na.rm = T),
per_sd_c = sd(per_male_cleft, na.rm = T))
```

## Language

```
lang_s <- cleft_meta %>%
  filter(construct == 2)
```

```
lang_s <- unique(lang_s$study_id)
```

```
cleft_meta_study %>%
  filter(study_id %in% lang_s) %>%
  mutate(total_n = cleft_n + comp_n) %>%
  summarise(n_studies = n(),
            reli_n = sum(reliability == 1, na.rm = T),
            synd_n = sum(syndrome_exclude == 1, na.rm = T),
            group_n = sum(study_design == 2 | study_design == 4),
            long_n = sum(study_design == 5),
            int_n = sum(study_design == 1 | study_design == 3),
            tot_n = sum(total_n, na.rm=T),
            mean_cleft_age = mean(cleft_age_m, na.rm=T),
            sd_cleft_age = sd(cleft_age_m, na.rm = T),
            mean_compare_age = mean(comp_age_m, na.rm=T),
            sd_compare_age = sd(comp_age_m, na.rm = T),
            tot_cleft_n = sum(cleft_n, na.rm=T),
            tot_compare_n = sum(comp_n, na.rm=T),
            mean_pal = mean(pal_repair_age, na.rm = T),
            usa = sum(international == 0),
            loc_other = sum(international == 1 | international == 9),
            pub_06 = sum(year >= 2006),
            pub_05 = sum(year < 2006),
            pal_sd = sd(pal_repair_age, na.rm = T),
            per_m_w = mean(per_male_whole, na.rm = T),
            per_sd_w = sd(per_male_whole, na.rm = T),
            per_m_c = mean(per_male_cleft, na.rm = T),
            per_sd_c = sd(per_male_cleft, na.rm = T))
```

## Meta results

The following code chunks are the code used to perform the intercept-only random effect models and the single-predictor regression analyses. Each subconstruct is analyzed in one code chunk. The output for these codes are the results seen in Tables 6 and 7.

### Consonant inventory

```
con_m <- robu(eff_g ~ 1, con, studynum = study_id, var.eff.size = var, rho = 0.8, small = TRUE)
```

```
con_m
```

```
con_regage <- robu(eff_g ~ age, con, studynum = study_id, var.eff.size = var, rho = 0.8, small = TRUE)
```

```
con_regage
```

```
con_regtype <- robu(eff_g ~ sample_context, con, studynum = study_id, var.eff.size = var, rho = 0.8, small = TRUE)
```

```
con_regtype
```

```
con_regcleft <- robu(eff_g ~ cleft_type, con, studynum = study_id, var.eff.size = var, rho = 0.8, small = TRUE)
```

```
con_regcleft
```

```
con_loc <- robu(eff_g ~ location, con, studynum = study_id, var.eff.size = var, rho = 0.8, small = TRUE)
```

```
con_loc
```

```
con_year <- robu(eff_g ~ year, con, studynum = study_id, var.eff.size = var, rho = 0.8, small = TRUE)
```

```
con_year
```

### Speech accuracy

```
acc_m <- robu(eff_g ~ 1, acc, studynum = study_id, var.eff.size = var, rho = 0.8, small = TRUE)
```

```
acc_m
```

```
acc_regage <- robu(eff_g ~ age, acc, studynum = study_id, var.eff.size = var, rho = 0.8, small = TRUE)
```

```
acc_regage
```

```
acc_regtype <- robu(eff_g ~ sample_context, acc, studynum = study_id, var.eff.size = var, rho = 0.8, small = TRUE)
```

```
acc_regtype
```

```
acc_regcleft <- robu(eff_g ~ cleft_type, acc, studynum = study_id, var.eff.size = var, rho = 0.8, small = TRUE)
```

```
acc_regcleft
```

```
acc_loc <- robu(eff_g ~ location, acc, studynum = study_id, var.eff.size = var, rho = 0.8, small = TRUE)
```

```
acc_loc
```

```
acc_year <- robu(eff_g ~ year, acc, studynum = study_id, var.eff.size = var, rho = 0.8, small = TRUE)
```

```
acc_year
```

## Speech Errors

```
error_m <- robu(eff_g ~ 1, error, studynum = study_id, var.eff.size = var, rho = 0.8, small = TRUE)
```

```
error_m
```

```
error_regage <- robu(eff_g ~ age, error, studynum = study_id, var.eff.size = var, rho = 0.8, small = TRUE)
```

```
error_regage
```

```
error_regtype <- robu(eff_g ~ sample_context, error, studynum = study_id, var.eff.size = var, rho = 0.8, small = TRUE)
```

```
error_regtype
```

```
error_regcleft <- robu(eff_g ~ cleft_type, error, studynum = study_id, var.eff.size = var, rho = 0.8, small = TRUE)
```

```
error_regcleft
```

```
error_loc <- robu(eff_g ~ location, error, studynum = study_id, var.eff.size = var, rho = 0.8, small = TRUE)
```

```
error_loc
```

```
error_year <- robu(eff_g ~ year, error, studynum = study_id, var.eff.size = var, rho = 0.8, small = TRUE)
```

```
ar, rho = 0.8, small = TRUE)
```

```
error_year
```

## Receptive language

```
recep_m <- robu(eff_g ~ 1, recep_d, studynum = study_id, var.eff.size = var,  
rho = 0.8, small = TRUE)
```

```
recep_m
```

```
recep_regression <- robu(eff_g ~ age, recep_d, studynum = study_id, var.eff.s  
ize = var, rho = 0.8, small = TRUE)
```

```
recep_regression
```

```
recep_regvocab <- robu(eff_g ~ sample_context, recep_d, studynum = study_id,  
var.eff.size = var, rho = 0.8, small = TRUE)
```

```
recep_regvocab
```

```
recep_regcleft <- robu(eff_g ~ cleft_type, recep_d, studynum = study_id, var.  
eff.size = var, rho = 0.8, small = TRUE)
```

```
recep_regcleft
```

```
recep_loc <- robu(eff_g ~ location, recep_d, studynum = study_id, var.eff.siz  
e = var, rho = 0.8, small = TRUE)
```

```
recep_loc
```

```
recep_year <- robu(eff_g ~ year, recep_d, studynum = study_id, var.eff.size =  
var, rho = 0.8, small = TRUE)
```

```
recep_year
```

## Expressive language

```
express_m <- robu(eff_g ~ 1, express_d, studynum = study_id, var.eff.size = v  
ar, rho = 0.8, small = TRUE)
```

```
express_m
```

```
express_rage <- robu(eff_g ~ age, express_d, studynum = study_id, var.eff.siz  
e = var, rho = 0.8, small = TRUE)
```

```
express_rage
```

```
express_rvocab <- robu(eff_g ~ sample_context, express_d, studynum = study_id  
, var.eff.size = var, rho = 0.8, small = TRUE)
```

```
express_rvocab
```

```
express_rmeasure <- robu(eff_g ~ measure_type, express_d, studynum = study_id,  
, var.eff.size = var, rho = 0.8, small = TRUE)
```

```
express_rmeasure
```

```
express_rtype <- robu(eff_g ~ cleft_type, express_d, studynum = study_id, var.  
.eff.size = var, rho = 0.8, small = TRUE)
```

```
express_rtype
```

```
express_loc <- robu(eff_g ~ location, express_d, studynum = study_id, var.eff.  
.size = var, rho = 0.8, small = TRUE)
```

```
express_loc
```

```
express_year <- robu(eff_g ~ year, express_d, studynum = study_id, var.eff.si  
ze = var, rho = 0.8, small = TRUE)
```

```
express_year
```

## Publication bias

The following code chunks analyze the subconstructs for publication bias. These results are presenting in Table 8 and Figure 2.

### Consonant Inventory

#### Egger test

```
metabias(con$eff_g, con$eff_se, method.bias = "linreg", plotit = TRUE)
```

#### Funnel plot

```
con_fun <- funnel(con$eff_g, con$eff_se, xlab = "Effect Sizes for Consonant I  
nventory", ylab = "Standard Error", sm = "SMD", axes = TRUE, col.random = "re  
d", yaxis = "se", level = 0.95, xlim = c(-3, 3), ylim = c(1, 0))
```

#### Trim and fill

```
trimfill(con$eff_g, con$eff_se, ma.fixed = FALSE, sm = "SMD", comb.random = T  
RUE)
```

### Speech accuracy

#### Egger test

```
metabias(acc$eff_g, acc$eff_se, method.bias = "linreg", plotit = TRUE)
```

## Funnel plot

```
acc_fun <- funnel(acc$eff_g, acc$eff_se, xlab = "Effect Sizes for Speech Accuracy", ylab = "Standard Error", sm = "SMD", axes = TRUE, col.random = "red", yaxis = "se", level = 0.95, xlim = c(-3, 3), ylim = c(1, 0))
```

## Trim and fill

```
trimfill(acc$eff_g, acc$eff_se, ma.fixed = FALSE, sm = "SMD", comb.random = TRUE)
```

## Speech error

### Egger test

```
metabias(error$eff_g, error$eff_se, method.bias = "linreg", plotit = TRUE)
```

### Funnel

```
error_fun <- funnel(error$eff_g, error$eff_se, comb.random = TRUE, xlim = c(-3, 3), ylim = c(1, 0), level = 0.95, xlab = "Effect Sizes for Speech Errors", ylab = "Standard Error", sm = "SMD", axes = TRUE)
```

## Trim and fill

```
trimfill(error$eff_g, error$eff_se, sm = "SMD")
```

## Expressive Language

### Egger test

```
metabias(express_d$eff_g, express_d$eff_se, method.bias = "linreg", plotit = TRUE)
```

### Funnel

```
express_fun <- funnel(express_d$eff_g, express_d$eff_se, xlab = "Effect Sizes for Expressive Language", ylab = "Standard Error", sm = "SMD", axes = TRUE, col.random = "red", yaxis = "se", level = 0.95, xlim = c(-3, 3), ylim = c(1, 0))
```

## Trim and fill

```
trimfill(express_d$eff_g, express_d$eff_se, ma.fixed = FALSE, sm = "SMD", comb.random = TRUE)
```

## Receptive Language

### Egger test

```
metabias(recep_d$eff_g, recep_d$eff_se, method.bias = "linreg", plotit = TRUE)
```

### Funnel

```
recep_fun <- funnel(recep_d$eff_g, recep_d$eff_se, xlab = "Effect Sizes for Receptive Language", ylab = "Standard Error", sm = "SMD", axes = TRUE, col.random = "red", yaxis = "se", level = 0.95, xlim = c(-3, 3), ylim = c(1, 0))
```

## Trim and fill

```
trimfill(recep_d$eff_g, recep_d$eff_se, ma.fixed = FALSE, sm = "SMD", comb.random = TRUE)
```
