# Supplementary material for: Early Speech and Language Development in Children With Nonsyndromic Cleft Lip and/or Palate: A Meta-Analysis
Source: PubMed Central journal article supplement (PMC7213476; doi:10.1044/2019_jslhr-19-00162), 2019-12-13
Supplement: JSLHR-63-14-s003.pdf [file JSLHR-63-14-s003.pdf]

**Supplemental Material S3.** List of citations and study ID number for included studies.

| Citation                                                                                                                                                                                                                                                                                                                                                                                                                      | Study ID |
|-------------------------------------------------------------------------------------------------------------------------------------------------------------------------------------------------------------------------------------------------------------------------------------------------------------------------------------------------------------------------------------------------------------------------------|----------|
| Broen, P. A., Devers, M. C., Doyle, S. S., Prouty, J. M., & Moller, K. T. (1998). Acquisition of linguistic and cognitive skills by children with cleft palate. <i>Journal of Speech, Language, and Hearing Research</i> , 41(3), 676–687. <a href="https://doi.org/10.1044/jslhr.4103.676">https://doi.org/10.1044/jslhr.4103.676</a>                                                                                        | 2        |
| Chapman, K. L., Graham, K. T., Gooch, J., & Visconti, C. (1998). Conversational skills of preschool and school-age children with cleft lip and palate. <i>The Cleft Palate-Craniofacial Journal</i> , 35, 503–516. <a href="https://doi.org/10.1597/1545-1569_1998_035_0503_csopas_2.3.co_2">https://doi.org/10.1597/1545-1569_1998_035_0503_csopas_2.3.co_2</a>                                                              | 3        |
| Chapman, K. L., & Hardin-Jones, M. A. (1992). Phonetic and phonological skills of two-year-olds with cleft palate. <i>The Cleft Palate-Craniofacial Journal</i> , 29(5), 435–443. <a href="https://doi.org/10.1597/1545-1569_1992_029_0435_papsot_2.3.co_2">https://doi.org/10.1597/1545-1569_1992_029_0435_papsot_2.3.co_2</a>                                                                                               | 73       |
| Chapman, K. L., Hardin-Jones, M. A., & Halter, K. A. (2003). The relationship between early speech and later speech and language performance for children with cleft lip and palate. <i>Clinical Linguistics &amp; Phonetics</i> , 17(3), 173–197. <a href="https://doi.org/10.1080/0269920021000047864">https://doi.org/10.1080/0269920021000047864</a>                                                                      | 4        |
| Chapman, K. L. (2011). The relationship between early reading skills and speech and language performance in young children with cleft lip and palate. <i>The Cleft Palate-Craniofacial Journal</i> , 48(3), 301–311. <a href="https://doi.org/10.1597/08-213">https://doi.org/10.1597/08-213</a>                                                                                                                              | 5        |
| Collett, B. R., Leroux, B., & Speltz, M. L. (2010). Language and early reading among children with orofacial clefts. <i>The Cleft Palate-Craniofacial Journal</i> , 47, 284–292. <a href="https://doi.org/10.1597/08-172.1">https://doi.org/10.1597/08-172.1</a>                                                                                                                                                              | 9        |
| Estrem, T., & Broen, P. A. (1987). Early speech production of children with cleft palate. <i>Journal of Speech and Hearing Research</i> , 32(1), 12–23. <a href="https://doi.org/10.1044/jshr.3201.12">https://doi.org/10.1044/jshr.3201.12</a>                                                                                                                                                                               | 56       |
| Fox, D., Lynch, J., & Brookshire, B. (1978). Selected developmental factors of cleft palate children between two and thirty-three months of age. <i>The Cleft Palate Journal</i> . Retrieved from <a href="http://www.ncbi.nlm.nih.gov/pubmed/282024">http://www.ncbi.nlm.nih.gov/pubmed/282024</a>                                                                                                                           | 55       |
| Hardin-Jones, M. A., & Chapman, K. L. (2014). Early lexical characteristics of toddlers with cleft lip and palate. <i>The Cleft Palate-Craniofacial Journal</i> , 51(6), 622–631. <a href="https://doi.org/10.1597/13-076">https://doi.org/10.1597/13-076</a>                                                                                                                                                                 | 15       |
| Hentges, F., Hill, J., Bishop, D. V. M., Goodacre, T., Moss, T., & Murray, L. (2011). The effect of cleft lip on cognitive development in school-aged children: A paradigm for examining sensitive period effects. <i>Journal of Child Psychology and Psychiatry and Allied Disciplines</i> , 52(6), 704–712. <a href="https://doi.org/10.1111/j.1469-7610.2011.02375.x">https://doi.org/10.1111/j.1469-7610.2011.02375.x</a> | 16       |
| Jones, C. E., Chapman, K. L., & Hardin-Jones, M. A. (2003). Speech development of children with cleft palate before and after palatal surgery. <i>The Cleft Palate-Craniofacial Journal</i> , 40(1), 19–31. <a href="https://doi.org/10.1597/1545-1569_2003_040_0019_sdocwc_2.0.co_2">https://doi.org/10.1597/1545-1569_2003_040_0019_sdocwc_2.0.co_2</a>                                                                     | 18       |

|                                                                                                                                                                                                                                                                                                                                                                                                 |    |
|-------------------------------------------------------------------------------------------------------------------------------------------------------------------------------------------------------------------------------------------------------------------------------------------------------------------------------------------------------------------------------------------------|----|
| Jocelyn, L. J., Penko, M. A., & Rode, H. L. (1996). Cognition, communication, and hearing in young children with cleft lip and palate and in control children: A longitudinal study. <i>Pediatrics</i> , 97(4), 529–534.                                                                                                                                                                        | 98 |
| Klintö, K., Salameh, E.-K., & Lohmander, A. (2015). Verbal competence in narrative retelling in 5-year-olds with unilateral cleft lip and palate. <i>International Journal of Language and Communication Disorders</i> , 50(1), 119–128. <a href="https://doi.org/10.1111/1460-6984.12127">https://doi.org/10.1111/1460-6984.12127</a>                                                          | 19 |
| Klintö, K., Salameh, E.-K., & Lohmander, A. (2016). Phonology in Swedish-speaking 5-year-olds born with unilateral cleft lip and palate and the relationship with consonant production at 3 years of age. <i>International Journal of Speech-Language Pathology</i> , 18(2), 147–156. <a href="https://doi.org/10.3109/17549507.2015.1081287">https://doi.org/10.3109/17549507.2015.1081287</a> | 20 |
| Klintö, K., Salameh, E.-K., Svensson, H., & Lohmander, A. (2011). The impact of speech material on speech judgement in children with and without cleft palate. <i>International Journal of Language &amp; Communication Disorders</i> , 46(3), 348–360. <a href="https://doi.org/10.3109/13682822.2010.507615">https://doi.org/10.3109/13682822.2010.507615</a>                                 | 57 |
| Kummer, A. W., Lee, L., Stutz, L. S., Maroney, A., & Brandt, J. W. (2007). The prevalence of apraxia characteristics in patients with velocardiofacial syndrome as compared with other cleft populations. <i>The Cleft Palate-Craniofacial Journal</i> , 44(2), 175–181. <a href="https://doi.org/10.1597/05-170.1">https://doi.org/10.1597/05-170.1</a>                                        | 93 |
| Lee, H.-C., Madison, C. L., & Jackson, R. (2014). Phonological competence in Mandarin Chinese-speaking children with cleft palate. <i>Asia Pacific Journal of Speech, Language and Hearing</i> , 12(1), 13–26. <a href="https://doi.org/10.1179/jslh.2009.12.1.13">https://doi.org/10.1179/jslh.2009.12.1.13</a>                                                                                | 90 |
| Lee, K. S. M., Young, S. E.-L., Liow, S. J. R., & Purcell, A. A. (2015). Spelling processes of children with nonsyndromic cleft lip and/or palate: A preliminary study. <i>The Cleft Palate-Craniofacial Journal</i> , 52(1), 70–81. <a href="https://doi.org/10.1597/13-120">https://doi.org/10.1597/13-120</a>                                                                                | 22 |
| Lohmander, A., & Persson, C. (2008). A longitudinal study of speech production in Swedish children with unilateral cleft lip and palate and two-stage palatal repair. <i>The Cleft Palate-Craniofacial Journal</i> , 45(1), 32–41. <a href="https://doi.org/10.1597/06-123.1">https://doi.org/10.1597/06-123.1</a>                                                                              | 23 |
| Luyten, A., Bettens, K., D’haeseleer, E., De Ley, S., Hodges, A., Galiwango, G., ... Van Lierde, K. (2014). The impact of palatal repair before and after 6 months of age on speech characteristics. <i>International Journal of Pediatric Otorhinolaryngology</i> , 78(5), 787–798. <a href="https://doi.org/10.1016/j.ijporl.2014.02.012">https://doi.org/10.1016/j.ijporl.2014.02.012</a>    | 84 |
| Luyten, A., Bettens, K., D’haeseleer, E., De Ley, S., Hodges, A., Galiwango, G., ... Van Lierde, K. (2014). Impact of early synchronous lip and palatal repair on speech. <i>Folia Phoniatrica et Logopaedica</i> , 65(6), 303–311. <a href="https://doi.org/10.1159/000362501">https://doi.org/10.1159/000362501</a>                                                                           | 24 |
| Nakajima, T., Mitsudome, A., & Yosikawa, A. (2001). Postoperative speech development based on cleft types in children with cleft palate. <i>Pediatrics International</i> , 43(6), 666–672. <a href="https://doi.org/10.1046/j.1442-200X.2001.01478.x">https://doi.org/10.1046/j.1442-200X.2001.01478.x</a>                                                                                      | 28 |
| Philips, B. J., & Harrison, R. J. (1969). Language skills of preschool cleft palate                                                                                                                                                                                                                                                                                                             | 49 |

|                                                                                                                                                                                                                                                                                                                                                                           |    |
|---------------------------------------------------------------------------------------------------------------------------------------------------------------------------------------------------------------------------------------------------------------------------------------------------------------------------------------------------------------------------|----|
| children. <i>The Cleft Palate Journal</i> . Retrieved from <a href="http://www.ncbi.nlm.nih.gov/pubmed/5253573">http://www.ncbi.nlm.nih.gov/pubmed/5253573</a>                                                                                                                                                                                                            |    |
| Priester, G. H., & Goorhuis-Brouwer, S. M. (2008). Speech and language development in toddlers with and without cleft palate. <i>International Journal of Pediatric Otorhinolaryngology</i> , 72(6), 801–806. <a href="https://doi.org/10.1016/j.ijporl.2008.02.004">https://doi.org/10.1016/j.ijporl.2008.02.004</a>                                                     | 91 |
| Scherer, N. J., D'Antonio, L. L., & McGahey, H. (2008). Early intervention for speech impairment in children with cleft palate. <i>The Cleft Palate-Craniofacial Journal</i> , 45(1), 18–31. <a href="https://doi.org/10.1597/06-085.1">https://doi.org/10.1597/06-085.1</a>                                                                                              | 37 |
| Scherer, N. J., Williams, L., Stoel-Gammon, C., & Kaiser, A. P. (2012). Assessment of single-word production for children under three years of age: Comparison of children with and without cleft palate. <i>International Journal of Otolaryngology</i> , 2012, Article ID 724214. <a href="https://doi.org/10.1155/2012/724214">https://doi.org/10.1155/2012/724214</a> | 38 |
| Scherer, N. J., Oravkinova, Z., & McBee, M. T. (2013). Longitudinal comparison of early speech and language milestones in children with cleft palate: A comparison of US and Slovak children. <i>Clinical Linguistics &amp; Phonetics</i> , 27(6–7), 404–418. <a href="https://doi.org/10.3109/02699206.2013.769024">https://doi.org/10.3109/02699206.2013.769024</a>     | 40 |
| Scherer, N. J., Williams, A. L., & Proctor-Williams, K. (2008). Early and later vocalization skills in children with and without cleft palate. <i>International Journal of Pediatric Otorhinolaryngology</i> , 72(6), 827–840. <a href="https://doi.org/10.1016/j.ijporl.2008.02.010">https://doi.org/10.1016/j.ijporl.2008.02.010</a>                                    | 72 |
| Scherer, N., & D'Antonio, L. L. (1995). Parent questionnaire for screening early language development in children with cleft palate. <i>The Cleft Palate-Craniofacial Journal</i> . <a href="https://doi.org/10.1597/1545-1569_1995_032_0007_pqfset.2.3.co.2">https://doi.org/10.1597/1545-1569_1995_032_0007_pqfset.2.3.co.2</a>                                         | 51 |
| Speltz, M. L., Endriga, M. C., Hill, S., Catherine, L., Jones, K., & Omnell, M. L. (2000). Brief report: Cognitive and psychomotor development of infants with orofacial clefts. <i>Journal of Pediatric Psychology</i> , 25(3), 185–190. <a href="https://doi.org/10.1093/jpepsy/25.3.185">https://doi.org/10.1093/jpepsy/25.3.185</a>                                   | 66 |
| Snyder, L. E., & Scherer, N. J. (2004). The development of symbolic play and language in toddlers with cleft palate. <i>American Journal of Speech-Language Pathology</i> , 13(1), 66–80. <a href="https://doi.org/10.1044/1058-0360(2004/008)">https://doi.org/10.1044/1058-0360(2004/008)</a>                                                                           | 42 |
| Willadsen, E., & Enemark, H. (2000). A comparative study of prespeech vocalizations in two groups of toddlers with cleft palate and a noncleft group. <i>The Cleft Palate-Craniofacial Journal</i> , 37(2), 172–178. <a href="https://doi.org/10.1597/1545-1569_2000_037_0172_acsopv.2.3.co.2">https://doi.org/10.1597/1545-1569_2000_037_0172_acsopv.2.3.co.2</a>        | 59 |
